# Supplementary material for: DynaStI: A Dynamic Retention Time Database for Steroidomics
Source: MDPI journal article supplement (doi:10.3390/metabo9050085), 2019-04-30
Supplement: s1 [file s1]

# DynaStI – Command line parameters for the DynMetID core

DynMetID can be run as a command line tool with the following parameters

```
>dynmetid <database host>...
      <database user> <password>...
      <database name> <compound property table>...
      <feature list file> <adduct list file>...
      <mass tolerance ppm>...
      <exp. ret. time tol. %> <QSRR ret. time tol. %>...
      <gradient start %> <gradient end %>...
      <gradient time min> <flow rate mL/min>...
      <dead time min> <dwell volume mL> [calibration list file]
```

The database must be an SQL database, with a table of compounds with the fields name, logkw and s, corresponding to each of the relevant parameters of the compound. The concrete database measured and curated in the context of the accompanying article is hosted at [dynasti.vital-it.ch](http://dynasti.vital-it.ch), as part of the Vital-IT infrastructure. The feature list must be a path to a plain-text file containing single line entries of the form

```
<retention time min>_<m/z of ion>m/z
```

or

```
<retention time min>_<exact neutral mass>n
```

in the case of features for which the neutral mass is already known. The adduct list must equally point to a plain-text file with entries providing

```
<adduct name>;<adduct mass excess>;<adduct charge>
```

Finally, the optional calibration list file should contain entries with

```
<compound name>;<experimental retention time min>
```

The name of the compound must, of course, match one of those in the database.
