# Supplementary material for: DynaStI: A Dynamic Retention Time Database for Steroidomics
Source: Metabolites. 2019 Apr 30;9(5):85. doi: 10.3390/metabo9050085 (PMC6572260; doi:10.3390/metabo9050085)
Supplement: Supplementary file 1 [file metabolites-09-00085-s001.zip]

Archive with 10 entries (10 files):
- dynasti-detailed-figure-captions.pdf
- dynmetid-command-line-reference.pdf
- figure-S1.svg
- figure-S2.svg
- figure-S3.svg
- figure-S4.svg
- figure-S5.svg
- figure-S6.svg
- Table S1. compounds-annotation-standards.csv
- Table S2. compounds-prediction-error.csv
