# Supplementary material for: DynaStI: A Dynamic Retention Time Database for Steroidomics
Source: Metabolites. 2019 Apr 30;9(5):85. doi: 10.3390/metabo9050085 (PMC6572260; doi:10.3390/metabo9050085)
Supplement: Supplementary file 1 [file metabolites-09-00085-s001.zip › Table S1. compounds-annotation-standards.csv]

DynaStI experimental	DynaStI QSRR
11-Dehydrocorticosterone	Pregnanolone
11-Dehydrotetrahydrocorticosterone	5a-Pregnan-20a-ol-3-one
11-Deoxycorticosterone	Adrenosterone
11-Deoxycortisol	17a-Estradiol
11-Ketoetiocholanolone	2-Methoxyestrone
11-Oxoandrosterone	17a,20a-Dihydroxypregn-4-en-3-one
11a-Hydroxyprogesterone	4-Hydroxyestradiol
11b-Hydroxyandrostenedione	4-Hydroxyestrone
11b-Hydroxyandrosterone	4-Methoxyestrone
11b-Hydroxyepiandrosterone	5b-Androstan-3a,17b-diol
11b-Hydroxyetiocholanolone	Beta-Cortol
11b-Hydroxyprogesterone	Epiandrosterone
11b-Hydroxytestosterone
15b-Hydroxytestosterone
16a-Hydroxy-DHEA
16a-Hydroxyandrostenedione
16a-Hydroxyandrosterone
16a-Hydroxyetiocholanolone
16a-Hydroxyprogesterone
16a-Hydroxytestosterone
16a,17b-Estriol
16b-Hydroxy-DHEA
16b-Hydroxytestosterone
17a-Hydroxypregnenolone
17a-Hydroxyprogesterone
19-Hydroxyandrostenedione
19-Hydroxytestosterone
2-Methoxyestradiol
20a-Cortolone
20a-Hydroxyprogesterone
20b-Cortolone
21-Deoxycortisol
21-Hydroxypregnenolone
2a-Hydroxytestosterone
2b-Hydroxytestosterone
3a-Hydroxyandrost-5-en-17-one
3a,5a-Tetrahydrocorticosterone
3a,5a-Tetrahydrodeoxycorticosterone
3a,5b-Tetrahydroaldosterone
3a,5b-Tetrahydrocorticosterone
3a,5b-Tetrahydrocortisol
3a,5b-Tetrahydrocortisone
4,5a-Dihydrotestosterone
5-Androsten-3b,17b-diol-16-one
5a-Androstan-3b-ol-7,17-dione
5a-Androstane-3,17-dione
5a-Androstane-3a-ol-17-one
5a-Androstane-3a,17b-diol
5a-Androstane-3b,12b,15a-triol
5a-Androstane-3b,7a,16b-triol
5a-Dihydro-11-deoxycorticosterone
5a-Dihydrocorticosterone
5a-Dihydrocortisol
5a-Dihydrocortisone
5a-Dihydroprogesterone
5b-Androstan-11a-ol-3,17-dione
5b-Androstan-11b-ol-3,17-dione
5b-Androstane-3,17-dione
5b-Dihydro-11-dehydrocorticosterone
5b-Dihydrocorticosterone
5b-Dihydrocortisol
5b-Dihydrocortisone
5b-Dihydroprogesterone
5b-Dihydrotestosterone
6a-Hydroxytestosterone
6b-Hydroxytestosterone
7a-Hydroxy-DHEA
7a-Hydroxyandrostenedione
7a-Hydroxypregnenolone
7a-Hydroxytestosterone
7b-Hydroxy-DHEA
Aldosterone
Androst-5-ene-3b,16a,17a-triol
Androst-5-ene-3b,16a,17b-triol
Androst-5-ene-3b,16b,17a-triol
Androstane-3b,5a,6b-triol
Androstenedione
17b-Estradiol
Corticosterone
Cortisol
Cortisone
DHEA
Epitestosterone
Estrone
Etiocholanolone
Pregnanediol
Pregnanetriol
Pregnanetriolone
Pregnenolone
Progesterone
Testosterone
Tetrahydro-11-desoxycortisol
