# Supplementary material for: DynaStI: A Dynamic Retention Time Database for Steroidomics
Source: Metabolites. 2019 Apr 30;9(5):85. doi: 10.3390/metabo9050085 (PMC6572260; doi:10.3390/metabo9050085)
Supplement: Supplementary file 1 [file metabolites-09-00085-s001.zip › Table S2. compounds-prediction-error.csv]

3a,5b-Tetrahydrocorticosterone
5a-Dihydrocorticosterone
16a-Hydroxyetiocholanolone
5b-Androstane-3,17-dione
5b-Androstan-11a-ol-3,17-dione
5a-Androstane-3,17-dione
5b-Dihydrocortisol
Aldosterone
11a-Hydroxyprogesterone
7a-Hydroxypregnenolone
5a-Dihydroprogesterone
2a-Hydroxytestosterone
5a-Androstane-3b,7a,16b-triol
2-Methoxyestradiol
Etiocholanolone
Tetrahydro-11-desoxycortisol
5a-Dihydrocortisone
Androstenedione
Androst-5-ene-3b,16a,17a-triol
5-Androsten-3b,17b-diol-16-one
3a,5a-Tetrahydrocorticosterone
20b-Cortolone
7a-Hydroxyandrostenedione
Progesterone
5b-Dihydrotestosterone
5b-Dihydroprogesterone
11b-Hydroxyandrostenedione
21-Deoxycortisol
5b-Dihydro-11-dehydrocorticosterone
DHEA
19-Hydroxyandrostenedione
6a-Hydroxytestosterone
6b-Hydroxytestosterone
3a,5b-Tetrahydrocortisol
Estrone
Pregnenolone
Cortisone
7a-Hydroxytestosterone
16a-Hydroxyandrostenedione
Testosterone
Pregnanediol
21-Hydroxypregnenolone
20a-Cortolone
Corticosterone
Androst-5-ene-3b,16a,17b-triol
Androstane-3b,5a,6b-triol
5a-Androstane-3a-ol-17-one
11-Deoxycortisol
16a-Hydroxyandrosterone
3a-Hydroxyandrost-5-en-17-one
16a,17b-Estriol
Androst-5-ene-3b,16b,17a-triol
3a,5b-Tetrahydrocortisone
11-Dehydrotetrahydrocorticosterone
2b-Hydroxytestosterone
5a-Dihydro-11-deoxycorticosterone
11b-Hydroxyprogesterone
11-Dehydrocorticosterone
11b-Hydroxyepiandrosterone
11-Oxoandrosterone
Pregnanetriol
3a,5a-Tetrahydrodeoxycorticosterone
Pregnanetriolone
5a-Dihydrocortisol
Cortisol
11b-Hydroxyetiocholanolone
5a-Androstane-3b,12b,15a-triol
5b-Dihydrocortisone
Epitestosterone
5b-Dihydrocorticosterone
